# Supplementary material for: Fungal Community Composition and Its Relationship with Volatile Compounds during Spontaneous Fermentation of Cabernet Sauvignon from Two Chinese Wine-Growing Regions
Source: MDPI journal article supplement (doi:10.3390/foods13010106), 2023-12-28
Supplement: s1 [file s1]

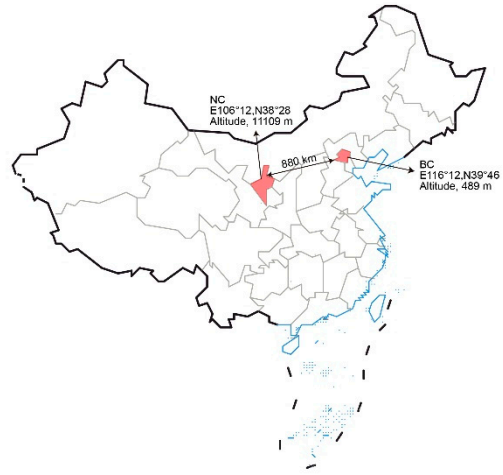

**Figure S1.** Sampling map of Cabernet Sauvignon from two wine-growing regions in China, located 880 kilometers apart.

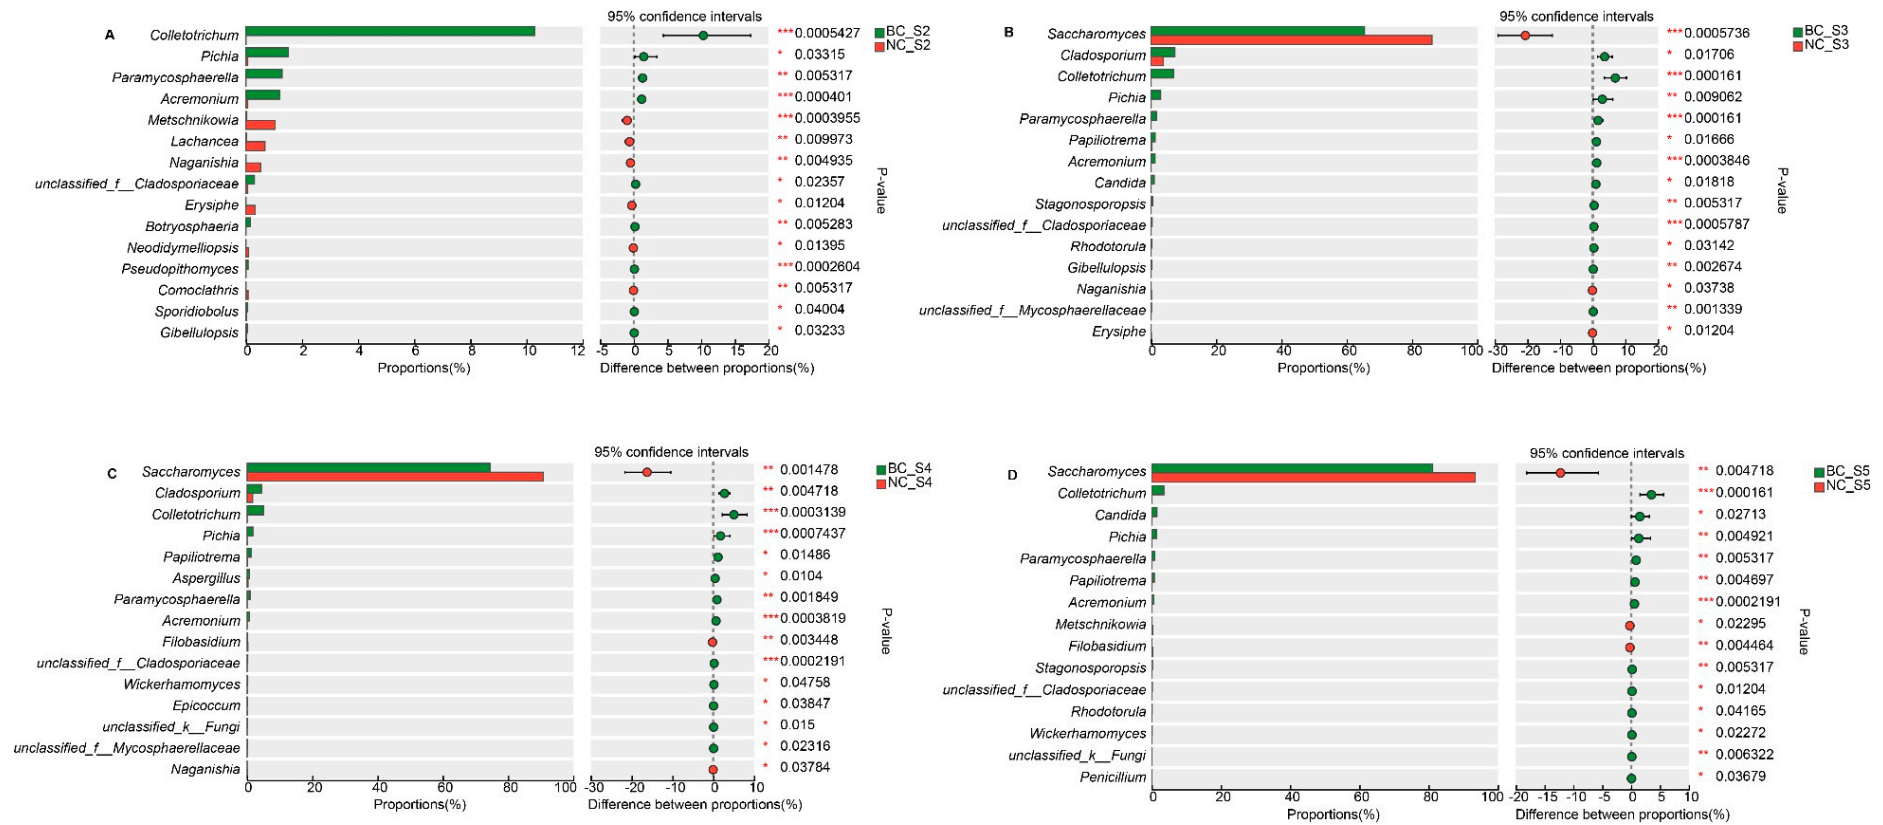

**Figure S2.** The fungal genera with significant differences in relative abundances between two wine-growing regions at different fermentation stages. Note: Wilcoxon rank-sum test,  $p < 0.05$ .
