# Supplementary material for: Fungal Community Composition and Its Relationship with Volatile Compounds during Spontaneous Fermentation of Cabernet Sauvignon from Two Chinese Wine-Growing Regions
Source: Foods. 2023 Dec 28;13(1):106. doi: 10.3390/foods13010106 (PMC10778937; doi:10.3390/foods13010106)
Supplement: Supplementary file 1 [file foods-13-00106-s001.zip › Supplementary-Tables.xlsx]

## Sheet: Table S1
Table S1. Analysis of similarities (ANOSIM) using distance matrices of category effects on fungal communities in spontaneous fermentations
Fermentation stages	R	p
Must	0.7459	0.001
Stage 2	0.3813	0.002
Stage 3	0.5672	0.001
Stage 4	0.7363	0.001
Stage 5	0.8422	0.001

## Sheet: Table S2
Table S2. Concentrations of volatile compounds in spontaneously fermented wines from two regions
Category	CAS Number	Compounds	Concentrations (µg/L)		p-value
			BC	NC
Alcohols	60-12-8	Phenethyl alcohol	3637.72 ± 246.50	5165.80 ± 548.82	<0.001
	71-36-3	1-Butanol	10.69 ± 2.31	26.56 ± 4.87	<0.001
	78-83-1	2-Methyl-1-propanol	241.31 ± 51.52	477.98 ± 59.86	<0.001
	111-27-3	Hexyl alcohol	259.81 ± 24.74	686.83 ± 75.12	<0.001
	111-35-3	3-Ethoxy-1-propanol	5.32 ± 0.98	8.26 ± 1.42	<0.001
	111-87-5	1-Octanol	38.88 ± 41.15	N.D.	<0.001
	505-10-2	3-Methylthiopropanol	43.19 ± 12.74	35.41 ± 8.72	0.173
	513-85-9	2,3-Butanediol	133.03 ± 58.35	595.44 ± 136.00	<0.001
	1117-61-9	β-Citronellol	3.46 ± 1.36	4.16 ± 1.15	0.136
	100-51-6	Benzyl alcohol	7.73 ± 2.35	N.D.	<0.001
	123-51-3	3-Methyl-1-butanol	5750.07 ± 409.29	8525.17 ± 1228.21	<0.001
	589-35-5	1-Pentanol, 3-methyl-	30.92 ± 7.94	32.49 ± 8.38	0.705
	626-89-1	4-Methyl-1-pentanol	10.16 ± 1.12	N.D.	<0.001
	104-76-7	2-Ethyl-1-hexanol	8.94 ± 2.93	N.D.	<0.001
	562-74-3	Terpinen-4-ol	2.51 ± 3.55	N.D.	0.258
	628-99-9	2-Nonanol	10.00 ± 3.54	N.D.	<0.001
	111-70-6	1-Heptanol	60.88 ± 9.94	N.D.	<0.001
	71-41-0	1-Pentanol	2.66 ± 3.77	N.D.	0.258
	35854-86-5	cis-6-Nonen-1-ol	N.D.	16.18 ± 23.66	<0.001
	928-96-1	Leaf alcohol	7.37 ± 1.63	16.50 ± 3.36	<0.001
Acids	124-07-2	Octanoic acid	349.85 ± 26.08	187.33 ± 48.38	<0.001
	142-62-1	Hexanoic acid	80.32 ± 14.84	129.61 ± 16.01	<0.001
	334-48-5	Decanoic acid	108.06 ± 12.38	61.70 ± 11.31	<0.001
	65-85-0	Benzoic acid	N.D.	25.59 ± 14.99	<0.001
Esters	96-48-0	γ-Butyrolactone	33.74 ± 9.41	222.51 ± 106.44	0.001
	105-54-4	Ethyl butyrate	5.31 ± 1.87	N.D.	<0.001
	106-30-9	Ethyl heptanoate	6.57 ± 1.91	14.08 ± 6.95	0.001
	106-32-1	Ethyl caprylate	2103.96 ± 899.16	4455.45 ± 1594.64	0.003
	106-33-2	Ethyl laurate	122.70 ± 151.77	839.10 ± 132.57	<0.001
	110-38-3	Ethyl caprate	1010.41 ± 216.50	4421.97 ± 727.19	<0.001
	110-42-9	Methyl n-caprate	19.92 ± 9.55	42.91 ± 12.48	0.003
	111-11-5	Methyl octanoate	N.D.	14.93 ± 4.22	<0.001
	111-82-0	Methyl laurate	N.D.	22.83 ± 12.50	<0.001
	119-36-8	Methyl salicylate	2.27 ± 3.23	N.D.	0.258
	123-25-1	Diethyl succinate	41.35 ± 21.49	158.81 ± 35.94	<0.001
	123-29-5	Ethyl nonanoate	11.91 ± 7.88	87.96 ± 42.41	<0.001
	123-66-0	Ethyl caproate	428.57 ± 74.63	926.69 ± 254.94	<0.001
	123-92-2	Isoamyl acetate	329.48 ± 68.47	533.34 ± 77.21	<0.001
	142-92-7	Hexyl acetate	9.70 ± 2.73	25.98 ± 3.97	<0.001
	628-97-7	Ethyl palmitate	2.29 ± 3.26	26.44 ± 10.81	<0.001
	2035-99-6	Octanoic acid, 3-methylbutyl ester	25.41 ± 19.77	104.26 ± 18.76	<0.001
	2198-61-0	Isopentyl hexanoate	17.37 ± 26.33	56.58 ± 85.71	0.73
	2306-91-4	Decanoic acid, 3-methylbutyl ester	17.01 ± 4.80	56.07 ± 12.98	<0.001
	5405-41-4	Ethyl 3-hydroxybutyrate	7.20 ± 1.28	19.16 ± 5.03	<0.001
	5461-06-3	Isobutyl caprylate	9.87 ± 2.17	18.26 ± 3.20	<0.001
	30673-38-2	Isobutyl decanoate	7.29 ± 10.33	3.64 ± 5.24	0.73
	67233-91-4	Ethyl 9-decenoate	71.55 ± 21.07	473.60 ± 127.84	<0.001
	103-45-7	Phenethyl acetate	87.34 ± 8.15	55.09 ± 7.44	<0.001
	124-06-1	Ethyl myristate	N.D.	29.13 ± 17.45	<0.001
	627-90-7	Ethyl undecanoate	N.D.	17.49 ± 8.44	<0.001
	141-78-6	Ethyl acetate	937.95 ± 158.29	2905.39 ± 1237.50	0.002
	1552-67-6	2-Hexenoic acid, ethylester	13.22 ± 4.70	15.94 ± 4.05	0.233
	97-64-3	Ethyl lactate	N.D.	99.77 ± 41.17	<0.001
	19329-89-6	3-Methylbutyl lactate	N.D.	38.35 ± 26.83	0.258
Aldehydes and ketones	100-52-7	Benzaldehyde	6.10 ± 1.91	22.83 ± 10.40	0.002
	23726-93-4	β-Damascenone	4.33 ± 6.31	N.D.	0.258
	127-41-3	α-Ionone	4.55 ± 1.32	N.D.	<0.001
	5973-71-7	3,4-Dimethylbenzaldehyde	4.24 ± 1.11	N.D.	<0.001
	124-19-6	1-Nonanal	1.84 ± 2.66	N.D.	0.258
Olefins	629-20-9	1,3,5,7-Cyclooctatetraene	3.66 ± 1.33	N.D.	<0.001
	30364-38-6	1,1,6-Trimethyl-1,2-dihydronaphthalene	6.92 ± 3.20	N.D.	<0.001
Phenols	108-95-2	Phenol	4.07 ± 1.01	8.23 ± 1.55	<0.001
Ethers	103-73-1	Phenetole	N.D.	2.38 ± 3.43	0.258
Note: The bolded p-values indicate significant differences in the concentrations of volatile compounds in Cabernet Sauvignon wines between the two regions. Data are presented as means ± standard deviations (n=9), N.D. denotes not detected.

## Sheet: Table S3
Table S3. Concentrations of volatile compounds in inoculated fermented wines
Category	CAS Number	Compounds	Number	Concentrations (µg/L)				VIP scores
				BB	BZ	ZZ	ZB	BB&BZ	ZZ&ZB
Alcohols	60-12-8	Phenethyl alcohol	C1	4198.99 ± 15.48	6052.83 ± 649.08	5751.81 ± 139.52	4996.11 ± 244.57	2.57078	2.25174
	100-51-6	Benzyl alcohol	C2	14.44 ± 1.94	17.84 ± 2.15	N.D.	N.D.
	104-76-7	2-Ethyl-1-hexanol	C3	N.D.	5.99 ± 0.68	N.D.	N.D.
	111-27-3	Hexyl alcohol	C4	291.82 ± 12.74	285.05 ± 35.87	320.79 ± 3.30	248.13 ± 10.89
	123-51-3	3-Methyl-1-butanol	C5	6772.36 ± 186.09	11098.72 ± 504.17	9395.91 ± 142.50	7958.93 ± 44.99	3.94602	3.21189
	589-35-5	1-Pentanol, 3-methyl-	C6	36.08 ± 1.49	N.D.	50.71 ± 2.68	66.94 ± 0.27
	928-96-1	Leaf alcohol	C7	5.28 ± 0.29	N.D.	N.D.	N.D.
	928-97-2	(E)-3-Hexenol	C8	13.61 ± 0.18	16.68 ± 2.60	11.30 ± 0.06	N.D.
	78-83-1	2-Methyl-1-propanol	C9	87.87 ± 11.34	517.67 ± 70.03	55.94 ± 8.57	118.31 ± 0.75	1.24112
	71-36-3	1-Butanol	C10	18.89 ± 1.38	119.96 ± 25.30	33.66 ± 1.28	36.05 ± 1.16
	505-10-2	3-Methylthiopropanol	C11	113.27 ± 7.89	136.27 ± 19.59	111.72 ± 4.23	184.42 ± 10.77
	513-85-9	2,3-Butanediol	C12	126.25 ± 13.77	371.84 ± 16.73	324.04 ± 11.88	540.42 ± 34.11		1.24158
	626-89-1	4-Methyl-1-pentanol	C13	8.79 ± 0.21	14.20 ± 0.00	12.50 ± 0.10	13.85 ± 0.80
	106-22-9	D-Citronellol	C14	6.19 ± 0.55	5.45 ± 0.72	N.D.	N.D.
	111-70-6	1-Heptanol	C15	39.79 ± 4.81	N.D.	N.D.	55.09 ± 5.52
	71-41-0	1-Pentanol	C16	N.D.	7.84 ± 0.91	N.D.	N.D.
Acids	124-07-2	Octanoic acid	C17	226.42 ± 21.75	196.69 ± 49.28	242.37 ± 42.34	205.78 ± 28.35
	142-62-1	Hexanoic acid	C18	108.28 ± 4.41	238.91 ± 23.42	96.16 ± 2.97	80.08 ± 3.63
	334-48-5	Decanoic acid	C19	81.79 ± 4.89	69.56 ± 14.94	144.39 ± 1.64	169.97 ± 15.32
	79-31-2	Isobutyric acid	C20	14.84 ± 0.75	51.46 ± 1.73	34.27 ± 0.11	N.D.
	143-07-7	Lauric acid	C21	N.D.	N.D.	N.D.	14.93 ± 1.26
Esters	142-92-7	Hexyl acetate	C22	36.11 ± 0.24	35.33 ± 4.79	96.47 ± 7.50	69.85 ± 0.60
	123-92-2	Isoamyl acetate	C23	382.40 ± 87.03	1822.70 ± 198.01	819.63 ± 39.50	648.60 ± 14.53	2.26195	1.08979
	96-48-0	γ-Butyrolactone	C24	47.46 ± 1.46	127.71 ± 15.06	134.75 ± 10.16	84.98 ± 7.27
	103-45-7	Phenethyl acetate	C25	208.66 ± 5.41	N.D.	551.61 ± 23.70	477.47 ± 0.13
	106-30-9	Ethyl heptanoate	C26	7.54 ± 0.04	N.D.	9.98 ± 0.08	N.D.
	106-32-1	Ethyl caprylate	C27	1665.77 ± 100.08	2365.31 ± 274.19	3567.49 ± 89.61	2945.20 ± 48.23	1.58184	2.07048
	110-38-3	Ethyl caprate	C28	1789.13 ± 37.33	2648.25 ± 294.91	4633.67 ± 689.31	3660.95 ± 193.62	1.75348	2.56349
	110-42-9	Methyl n-caprate	C29	21.41 ± 1.25	27.33 ± 5.57	34.41 ± 5.22	41.88 ± 0.48
	123-25-1	Diethyl succinate	C30	68.50 ± 6.19	86.21 ± 9.81	45.66 ± 1.10	30.46 ± 2.30
	123-29-5	Ethyl nonanoate	C31	9.73 ± 0.11	21.08 ± 3.06	14.02 ± 1.58	13.95 ± 1.76
	123-66-0	Ethyl caproate	C32	468.41 ± 27.43	78.17 ± 9.18	664.88 ± 11.00	520.70 ± 21.54	1.17696
	623-50-7	Ethyl glycolate	C33	4.10 ± 0.90	N.D.	N.D.	N.D.
	5405-41-4	Ethyl 3-hydroxybutyrate	C34	10.94 ± 0.57	N.D.	5.04 ± 0.08	11.98 ± 1.05
	27829-72-7	Ethyl (E)-hex-2-enoate	C35	12.05 ± 0.54	N.D.	N.D.	N.D.
	67233-91-4	Ethyl 9-decenoate	C36	654.08 ± 102.18	1056.63 ± 75.64	1672.92 ± 70.47	1656.98 ± 125.13	1.16729
	628-97-7	Ethyl palmitate	C37	N.D.	3.43 ± 0.21	5.91 ± 0.60	5.69 ± 0.55
	111-11-5	Methyl octanoate	C38	N.D.	11.10 ± 2.21	N.D.	8.27 ± 0.90
	687-47-8	Ethyl L(-)-lactate	C39	N.D.	20.39 ± 3.65	N.D.	N.D.
	1552-67-6	2-Hexenoic acid, ethylester	C40	N.D.	21.97 ± 0.38	N.D.	N.D.
	106-33-2	Ethyl laurate	C41	N.D.	N.D.	682.45 ± 50.94	1288.00 ± 301.97		1.94113
	2306-91-4	Decanoic acid, 3-methylbutyl ester	C42	N.D.	N.D.	65.67 ± 1.14	N.D.
	627-90-7	Ethyl undecanoate	C43	N.D.	N.D.	N.D.	3.44 ± 0.01
	30673-38-2	Isobutyl decanoate	C44	N.D.	N.D.	N.D.	5.80 ± 0.52
	105-54-4	Ethyl butyrate	C45	N.D.	N.D.	16.65 ± 5.40	N.D.
Aldehydes and ketones	100-52-7	Benzaldehyde	C46	6.16 ± 0.60	8.54 ± 0.91	7.38 ± 1.49	7.47 ± 1.05
	112-12-9	2-Undecanone	C47	N.D.	N.D.	N.D.	4.53 ± 0.11
Note: Compounds with VIP score > 1 are differential volatile metabolites between groups. Blank spaces in VIP scores indicate VIP score < 1. Data are presented as mean ± standard deviation (n=3), N.D. denotes not detected.
